# Supplementary material
Source: publisher site journal article supplement (https://www.spandidos-publications.com/4156/downloadSupplementary)
Supplement: Supplementary file 1 [file downloadSupplementary]

**E**

PTPN12

| Cell Line              | Fold change |
|------------------------|-------------|
| T-47D                  | 1.0         |
| T-47D/CGA <sup>+</sup> | ~0.1        |
